# Supplementary material for: Carbinolamine Formation and Dehydration in a DNA Repair Enzyme Active Site
Source: PubMed Central journal article supplement (PMC3285167; doi:10.1371/journal.pone.0031377), 2012-02-22
Supplement: pone.0031377.s004.pdf [file pone.0031377.s004.pdf]

## Supplemental Information for Carbinolamine Formation and Dehydration in a DNA Repair Enzyme Active Site

M. L. Dodson<sup>1,\*</sup>, Ross C. Walker<sup>2</sup>, R. Stephen Lloyd<sup>3</sup>

**1 M. L. Dodson, Active Site Dynamics LLC, 611 Chedworth Drive, Houston, TX 77062, USA**

**2 Ross C. Walker, San Diego Supercomputer Center and Department of Chemistry and Biochemistry, University of California San Diego, La Jolla, CA 92093, USA**

**3 R. Stephen Lloyd, Center for Research on Occupational and Environmental Toxicology, Oregon Health & Science University, Portland, OR 97239, USA**

\* E-mail: mldodson@comcast.net

### Calculation of the Gore *et al.* statistics [1, 2]

Following the approach of Bustamante *et al.* [1,2], consider a system at temperature  $T$  whose equilibrium state is determined by a control parameter  $x$ . Let the system initially be in state  $A$  with control parameter  $x_A$ . If the system is evolved via a nonequilibrium process by changing  $x$  along a given path  $x(t)$  to some final value  $x_B$ , the Jarzynski relationship states that

$$\exp(-\Delta G_{x_A \rightarrow x_B}/k_B T) = \langle \exp(-W_{x_A \rightarrow x_B}/k_B T) \rangle,$$

where  $\Delta G$  is the free energy difference between equilibrium states  $A$  and  $B$ ,  $W$  is the work done along the trajectory  $x(t)$ ,  $k_B$  is Boltzmann's constant and  $\langle \cdot \rangle$  denotes an average over an infinite number of such nonequilibrium experiments repeated under the protocol  $x(t)$ . Alternatively, the Jarzynski average is an estimate for the path  $x(t)$  traversed at infinitely slow velocity, i.e., by a quasi-static transformation [3, p. 339]. To calculate a full estimate of the potential of mean force over a reaction, a Jarzynski average must be calculated at each trajectory sampling time  $x_j$ . It should be emphasized that the Jarzynski relationship is defined by an average over an infinite number of trajectories. Averaging over only a finite number of trajectories introduces a truncation bias. Gore, *et al.* have reported methods to correct for this bias. The calculation of the finite Jarzynski average for  $N$  replicates and one trajectory sample  $j$  is

given by:

$$\Delta\hat{G}_J(N) = -\beta^{-1}\log\left[\frac{1}{N}\sum_{i=1}^N e^{-\beta W_i}\right],$$

where

$$\beta = \frac{1}{k_B T}.$$

The mean work is calculated as:

$$\Delta\hat{G}_{MW}(N) = \langle W \rangle_N = \frac{1}{N}\sum_{i=1}^N W_i.$$

Dropping the  $N$  for clarity, the dissipative work is given by:

$$\bar{W}_{dis} = \langle W \rangle - \Delta\hat{G}_J.$$

The bias and mean square error (MSE) require a function,  $\alpha(\bar{W}_{dis})$ , which depends on a parameter  $C$  (Gore, *et al.* equation 9):

$$\alpha = \frac{\log[2\beta C \bar{W}_{dis}]}{\log[C(e^{2\beta \bar{W}_{dis}} - 1)]}.$$

A sensitivity analysis demonstrated that the  $\alpha$  function showed only minor differences for  $C = 30, 40$  or  $50$ , whereas  $C = 15$  deviated to a larger degree from the others.  $C = 40$  seems a good compromise.

A first order correction to the dissipative work is given by (sentence before Gore, *et al.* equation 19):

$$\hat{W}_{dis2} = \langle W \rangle - \Delta\hat{G}_J + \frac{\hat{W}_{dis}}{N\alpha(\hat{W}_{dis})},$$

and the final free energy difference estimator is given by Gore, *et al.* equation 19. This is the bias-corrected Jarzynski average:

$$\Delta\hat{G}_{J2} = \Delta\hat{G}_J - \hat{B}_{J2},$$

where

$$\hat{B}_{J2} = \frac{\hat{W}_{dis2}}{N\alpha(\hat{W}_{dis2})}.$$

The MSE estimator is given by Gore, *et al.* equation 17,

$$\text{MSE}_J = \frac{2\bar{W}_{dis}}{\beta N^\alpha(\bar{W}_{dis})} + \frac{(\bar{W}_{dis})^2}{(N^\alpha(\bar{W}_{dis}))^2},$$

and for the  $J_2$  estimator (used here):

$$\text{MSE}_{J_2} = \frac{2\bar{W}_{dis2}}{\beta N^\alpha(\bar{W}_{dis2})} + \frac{(\bar{W}_{dis2})^2}{(N^\alpha(\bar{W}_{dis2}))^2}.$$

The  $\text{RMSE}_{J_2}$  is given by  $\text{sqrt}(\text{MSE}_{J_2})$ .

## References

1. Gore J, Ritort F, Bustamante C (2003) Bias and error in estimates of equilibrium free-energy differences from nonequilibrium measurements. *Proc Nat Acad Sci USA* 100: 12564–12569.
2. Bustamante C, Liphardt J, Ritort F (2005) The nonequilibrium thermodynamics of small systems. *Physics Today* 58, Iss. 7: 43–48.
3. Xiong H, Crespo A, Marti M, Estrin D, Roitberg A (2006) Free energy calculations with non-equilibrium methods: Applications of the Jarzynski relationship. *Theoretical Chemistry Accounts: Theory, Computation, and Modeling (Theoretica Chimica Acta)* 116: 338–346.
